# Supplementary material for: A facile transetherification route to polysulfone-poly(ethylene glycol) amphiphilic block copolymers with improved protein resistance
Source: Royal Society of Chemistry journal article supplement (doi:10.1039/c3py01619f), 2014-01-01
Supplement: c3py01619f.pdf [file c3py01619f.pdf]

## Supporting Information

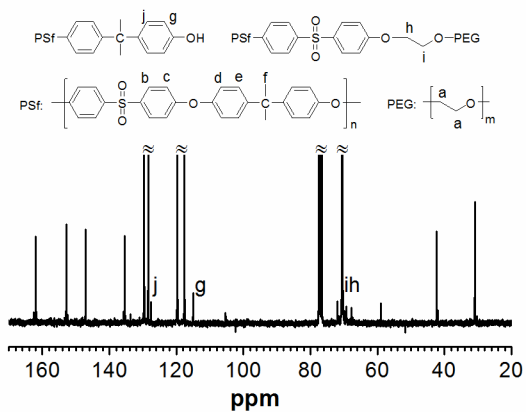

**Figure S1.** <sup>13</sup>C spectrum of PSf-PEG<sub>5000</sub> (31.1 wt% PEG, 15.0 h).

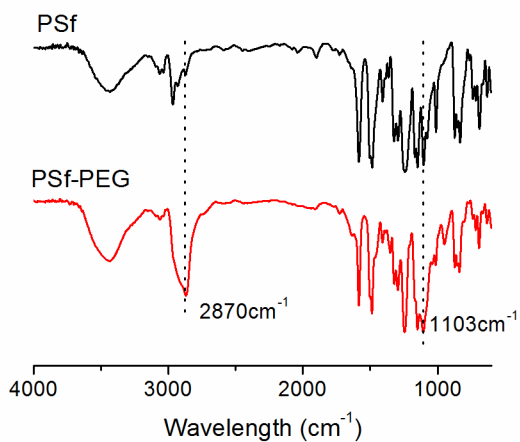

**Figure S2.** FTIR spectra of PSf and PSf-PEG<sub>5000</sub> (31.1 wt% PEG, 15.0 h).
